# Supplementary material for: Clinicopathologic Features of Epithelial Myoepithelial Carcinoma of the Head and Neck: Analysis of Demographics, Clinical Characteristics, and Treatment Modality
Source: Research Square preprint supplement (doi:10.21203/rs.3.rs-6265268/v1), 2025-03-25
Supplement: Supplementary file 1 [file 90c911295be89a9066750927.docx]

**Supplemental Table 1:** Outcomes and Survival Analysis of overall survival, cause specific survival, and treatment modality in disease specific survival

| **Survival** | **Percent Survival Rate (%, C.I. 95%)** | | | |
| --- | --- | --- | --- | --- |
|  | **Overall Observed** | **Cause specific survival** | **Surgery** | **Surgery & Radiation** |
| 1 year | 92.6% (94.0-91.2) | 96.5% (97.5-95.5) | 96.8% (95.5-98.1) | 97.0% (95.5-98.5) |
| 5 years | 77.7% (80.2-75.2) | 91.6% (93.3-89.9) | 93.6% (91.6-95.6) | 90.9% (88.1-93.7) |

+Chemotherapy only & Combination Therapy was not included as data was skewed

**Supplemental Table 2:** Race Disease Specific Survival Analysis

| **Survival** | **Percent Survival Rate (%, C.I. 95%)** | | |
| --- | --- | --- | --- |
|  | **White** | **Black*** | **Asian, Pacific Islander, American Indian or Alaska Native*** |
| 1 year | 97.0% (92.6-94.8) | 100% (-) | 89.0% (84.0-93.0) |
| 5 years | 91.2% (89.2-93.2) | 96.0% (92.0-100.0) | 89.0% (84.0-93.0) |

*Value may be skewed due to limited number of cases

**Supplemental Table 3:** Sex Cause Specific Survival

| **Survival** | **Percent Survival Rate (%, C.I. 95%)** | |
| --- | --- | --- |
|  | **Male** | **Female** |
| 1 year | 98.1% (97.0-99.2) | 95.2% (93.6-96.8) |
| 5 years | 94.9% (92.8-97.0) | 89.0% (86.5-91.5) |

*Value may be skewed due to limited number of cases
